# Supplementary material
Source: PubMed Central journal article supplement (PMC5628136)
Supplement: NIHMS892568-supplement-7.pdf [file NIHMS892568-supplement-7.pdf]

**Table S1. Patient background of each dataset**

| <b>Variables</b>             | <b>TCGA<br/>(n=515)</b> | <b>PROSPECT<br/>(n=180)</b> | <b>BATTLE-1<br/>(n=57)</b> | <b>BATTLE-2<br/>(n=103)</b> |
|------------------------------|-------------------------|-----------------------------|----------------------------|-----------------------------|
| <b>Median age (years)</b>    | 67                      | 63                          | 56                         | 59                          |
| <b>Gender</b>                |                         |                             |                            |                             |
| Male                         | 238                     | 92                          | 30                         | 46                          |
| Female                       | 277                     | 88                          | 27                         | 57                          |
| <b>Smoking</b>               |                         |                             |                            |                             |
| Never                        | ND                      | 24                          | 13                         | 27                          |
| Former/Current               | ND                      | 156                         | 44                         | 76                          |
| <b>p-Stage</b>               |                         |                             |                            |                             |
| Stage I                      | 278                     | 92                          | 2                          | ND                          |
| Stage II                     | 124                     | 45                          | 2                          | ND                          |
| Stage III                    | 84                      | 41                          | 13                         | ND                          |
| Stage IV                     | 27                      | 2                           | 39                         | ND                          |
| NA                           | 2                       | 0                           | 0                          |                             |
| <b>Former drug treatment</b> |                         |                             |                            |                             |
| Yes                          | ND                      | 29                          | 57                         | 103                         |
| No                           | ND                      | 151                         | 0                          | 0                           |

**Table S2. Univariate Cox proportional hazards regression analysis in lung adenocarcinoma samples**

| Dataset (n)           | OS   |           | <i>P</i> value | RFS or PFS |           | <i>P</i> value |
|-----------------------|------|-----------|----------------|------------|-----------|----------------|
|                       | HR   | 95% CI    |                | HR         | 95% CI    |                |
| <b>TCGA (515)</b>     | 1.18 | 1.00-1.40 | 0.050          | ND         | ND        | ND             |
| <b>PROSPECT (180)</b> | 1.03 | 0.84-1.27 | 0.77           | 1.25       | 1.01-1.55 | 0.039          |
| <b>BATTLE-1 (57)</b>  | 1.17 | 0.78-1.75 | 0.44           | 1.15       | 0.83-1.59 | 0.40           |
| <b>BATTLE-2 (103)</b> | 1.09 | 0.86-1.36 | 0.48           | 1.05       | 0.84-1.32 | 0.65           |

OS, overall survival; HR, hazard ratio; CI, confidence interval; RFS, recurrence-free survival; PFS, progression-free survival; ND, no data.

**Table S3. Univariate and multivariate Cox regression model of PROSPECT patients**

| Variables        |                                          | Univariate<br>HR (95% CI)            | p               | Multivariate<br>(without<br>interactions)<br>HR (95% CI) | p              | Multivariate<br>(with interactions)<br>HR (95% CI) | p       |
|------------------|------------------------------------------|--------------------------------------|-----------------|----------------------------------------------------------|----------------|----------------------------------------------------|---------|
| Age              | Per 1 year increase<br>>Median vs ≤63.79 | 1.01(0.99-1.03)<br>1.35 (0.86-2.12)  | 0.49<br>0.19    | 1.75 (1.09-2.81)                                         | 0.019          | 1.73 (1.06-2.83)                                   | 0.028   |
| Gender           | Male vs Female                           | 1.13 (0.72-1.77)                     | 0.60            | -                                                        | -              | -                                                  | -       |
| Smoking          | Never vs Current<br>Former vs Current    | 1.67 (0.86-3.21)<br>1.23 (0.77-2.07) | 0.13<br>0.35    | -                                                        | -              | -                                                  | -       |
| Tumor size       | Per 1 cm increase<br>>Median vs ≤3.5     | 1.20 (1.09-1.32)<br>1.74 (1.11-2.73) | 0.0002<br>0.015 | 1.27 (1.13-1.42)                                         | <0.0001        | 1.28 (1.14-1.44)                                   | <0.0001 |
| pathologic-Stage | II vs I<br>III-IV vs I                   | 1.28 (0.72-2.29)<br>3.04 (1.80-5.11) | 0.40<br><0.0001 | 0.88 (0.47-1.66)<br>2.43 (1.39-4.23)                     | 0.70<br>0.0019 | *<br>**                                            |         |
| Neoadjuvant      | Yes vs No                                | 2.06 (1.19-3.59)                     | 0.010           | -                                                        | -              | ***                                                |         |
| Adjuvant         | Yes vs No                                | 1.43 (0.91-2.27)                     | 0.12            | -                                                        | -              | -                                                  |         |
| OSMR             | Per 1 unit change                        | 1.25 (1.01-1.55)                     | 0.039           | 1.21 (0.98-1.49)                                         | 0.080          | 1.25 (1.01-1.55)****                               | 0.045   |

HR, hazard ratio; CI, confident interval

\* Stage II vs. I without neoadjuvant, HR (95% CI); 1.071 (0.557-2.061) (p=0.84),

Stage II vs. I with neoadjuvant, HR (95% CI); 0.148 (0.026-0.846) (p=0.032)

\*\* Stage III-IV vs. I without neoadjuvant, HR (95% CI); 2.286 (1.206-4.333) (p=0.011)

Stage III-IV vs. I with neoadjuvant, HR (95% CI); 1.073 (0.332-3.468) (p=0.91)

\*\*\* Neoadjuvant Yes vs. No for Stage I, HR (95% CI); 4.010 (1.51-10.68) (p=0.0055)

Neoadjuvant Yes vs. No for Stage II, HR (95% CI); 0.554 (0.12-2.51) (p=0.44)

Neoadjuvant Yes vs. No for Stage III-IV, HR (95% CI); 1.881 (0.82-4.31) (p=0.13)

\*\*\*\* HR of recurrence for OSMR in 1-unit change, adjusting for age group, tumor size, neoadjuvant, final stage, and interaction between neo adjuvant and final stage, is 1.25 (95% CI, 1.005-1.546).
