# Supplementary material
Source: PubMed Central journal article supplement (PMC5628136)

**Fig. S1**

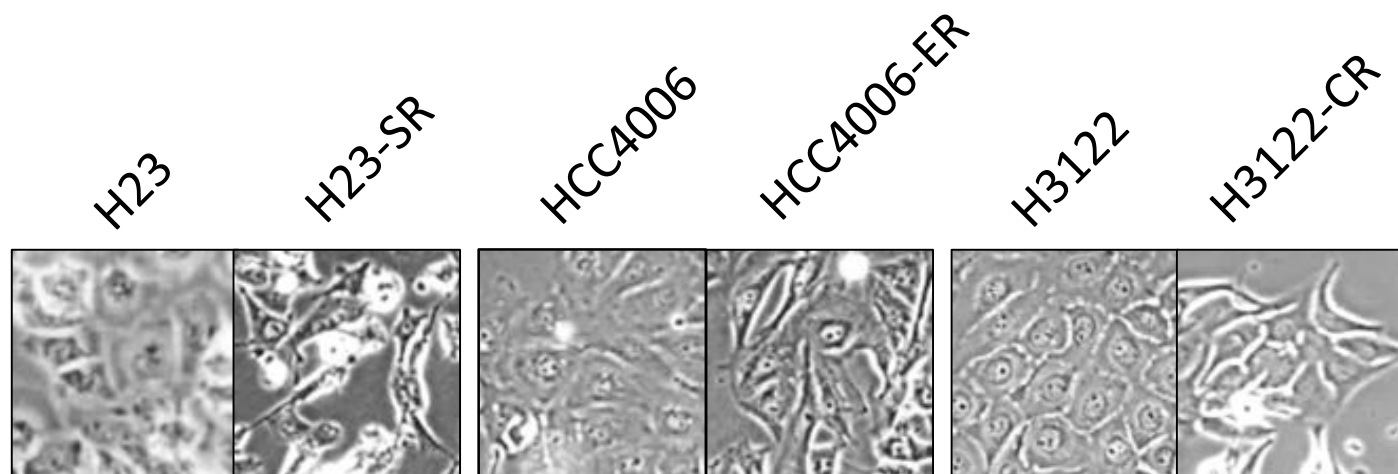

Supplement: NIHMS892568-supplement-1.pdf [file NIHMS892568-supplement-1.pdf]

# Fig. S2

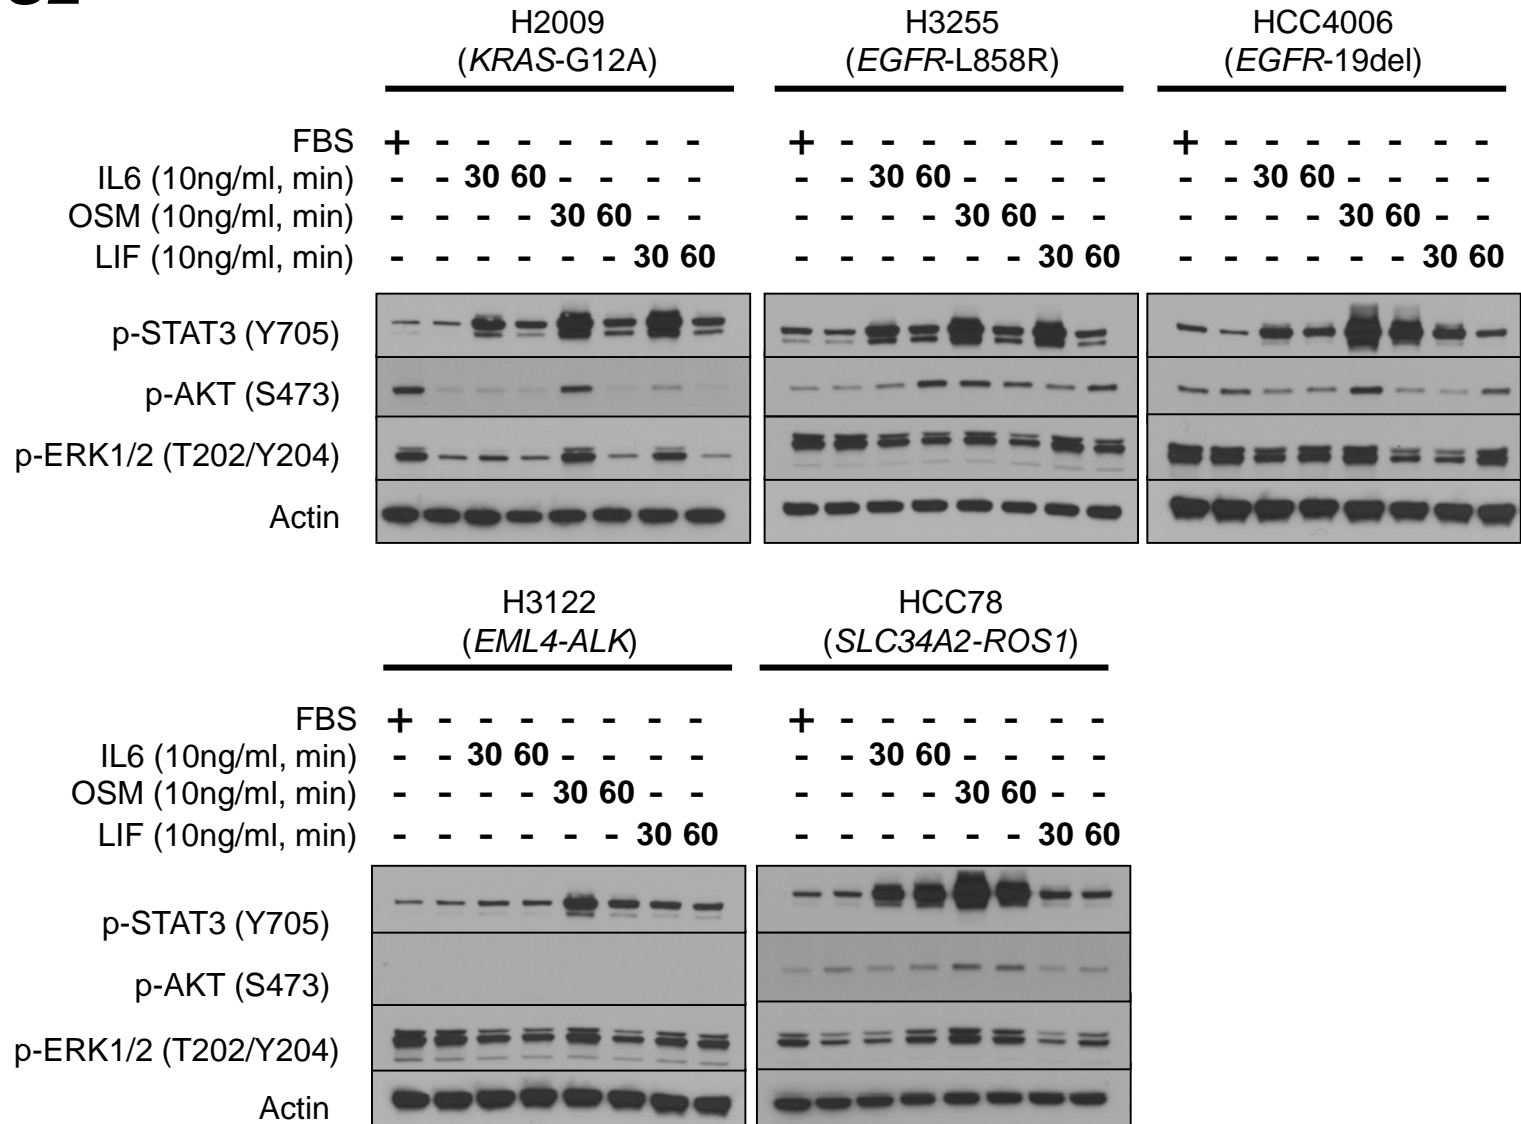

Supplement: NIHMS892568-supplement-2.pdf [file NIHMS892568-supplement-2.pdf]

# Fig. S3

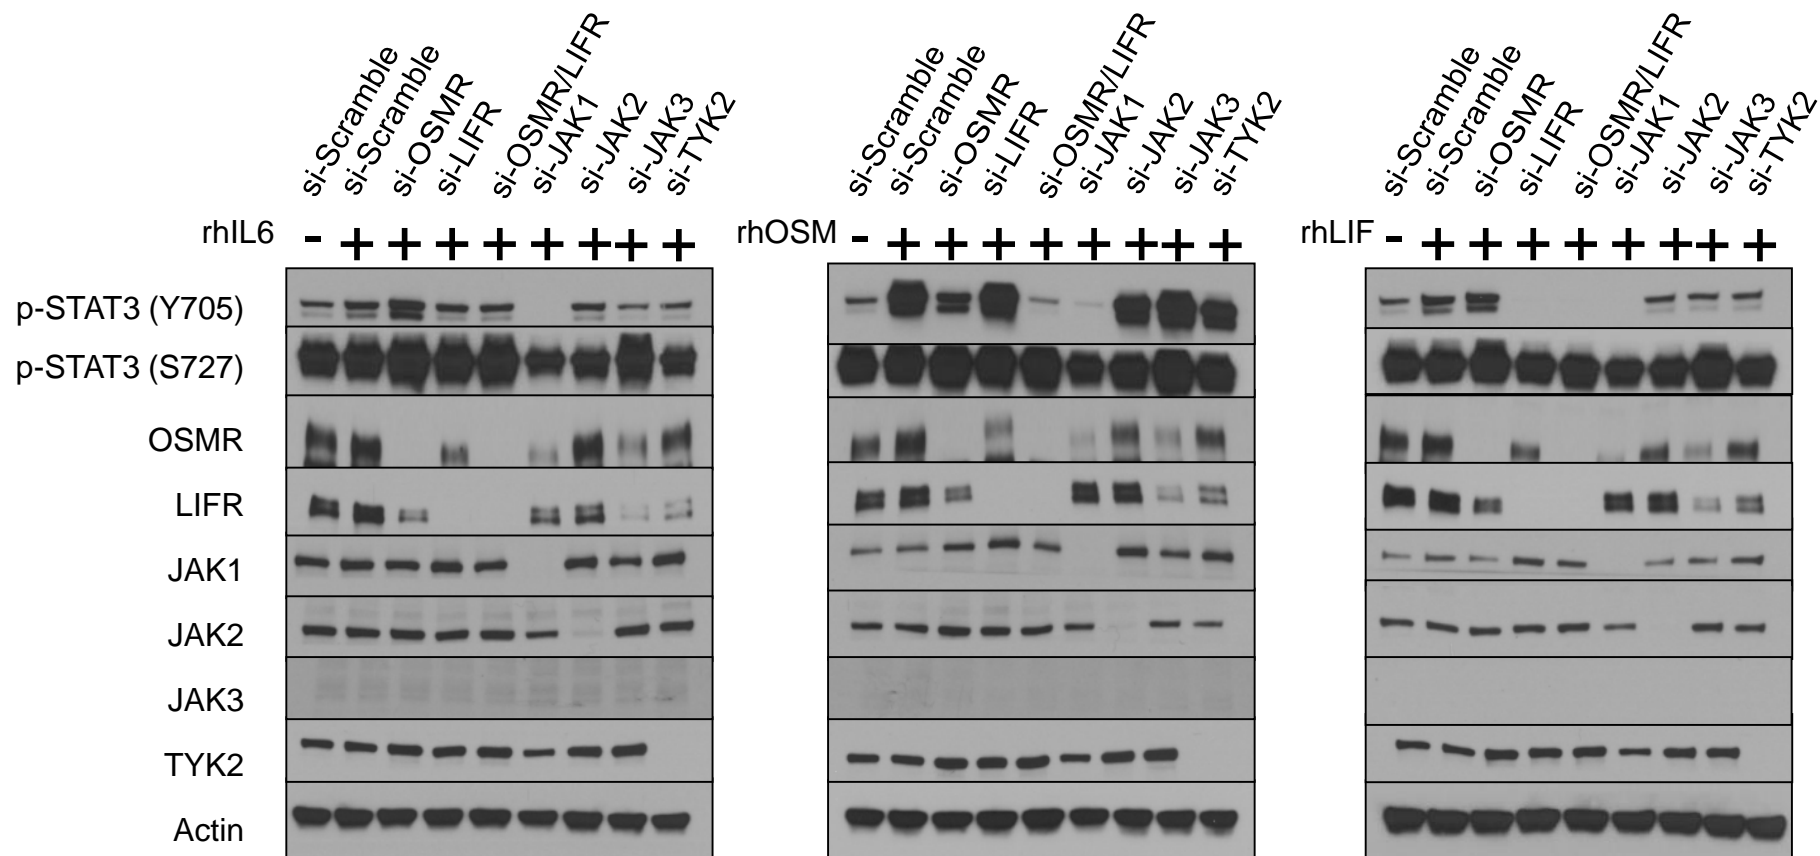

Supplement: NIHMS892568-supplement-3.pdf [file NIHMS892568-supplement-3.pdf]

**Fig. S4**

Mock

+ rhOSM

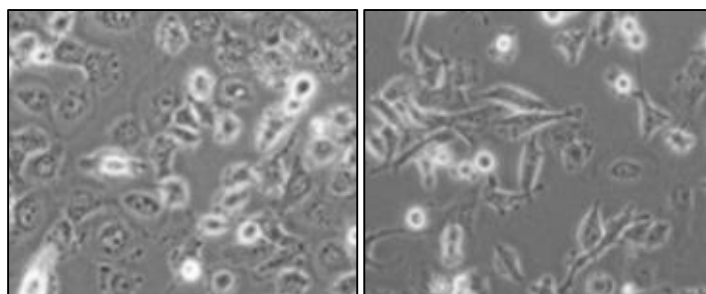

Supplement: NIHMS892568-supplement-4.pdf [file NIHMS892568-supplement-4.pdf]

**Fig. S5**

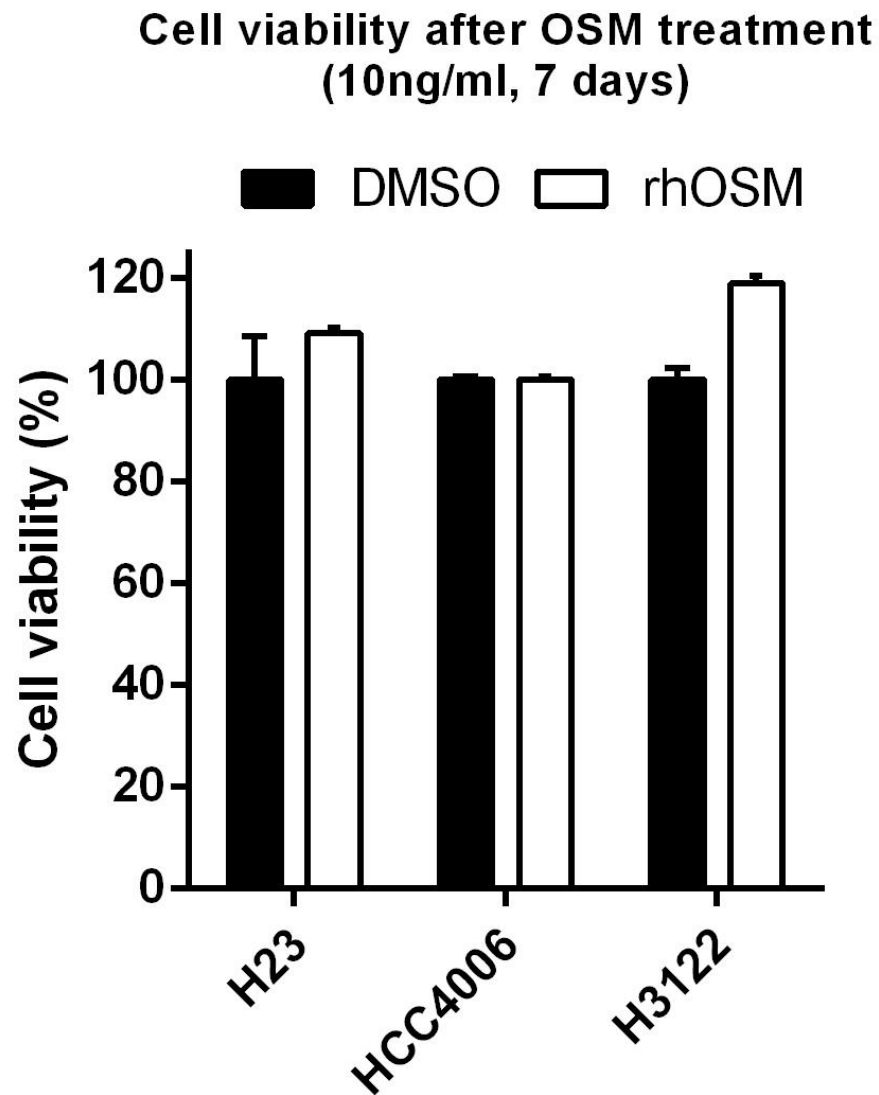

Supplement: NIHMS892568-supplement-5.pdf [file NIHMS892568-supplement-5.pdf]

**Fig. S6**

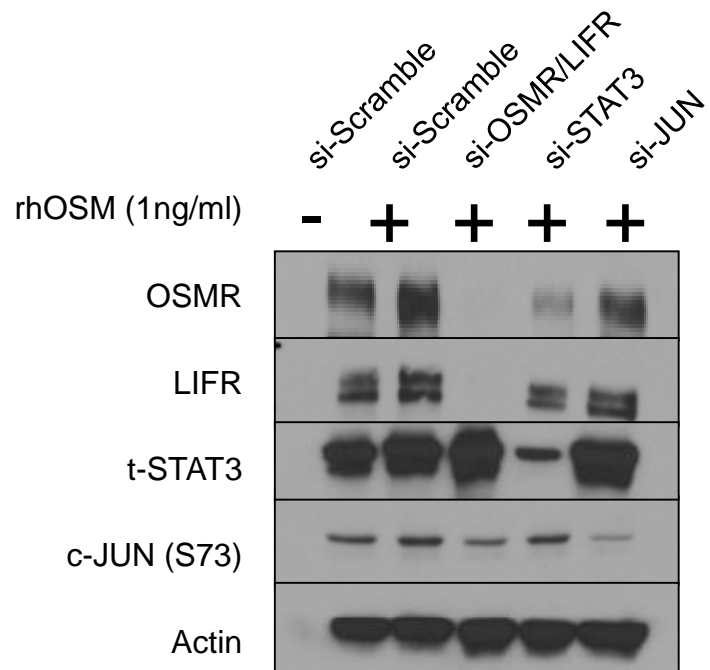

Supplement: NIHMS892568-supplement-6.pdf [file NIHMS892568-supplement-6.pdf]
